1 **Chromatin-associated effectors of energy-sensing pathways mediate**  
2 **intergenerational effects**

3

4 Pedro Robles<sup>1</sup>, Anisa Turner<sup>1</sup>, Giusy Zuco<sup>1</sup>, Panagiota Paganopolou<sup>1</sup>, Beth Hill<sup>1</sup>,  
5 Vikas Kache<sup>2</sup>, Christine Bateson<sup>2</sup>, Andre Pires-daSilva<sup>\*</sup>

6

7 <sup>1</sup> School of Life Sciences University of Warwick, Coventry, CV4 7AL, UK

8 <sup>2</sup> Department of Biology, University of Texas at Arlington, Arlington, TX, 76019, USA

9 <sup>\*</sup> Corresponding author

10

11 **Environmental stimuli experienced by the parental generation influence the**  
12 **phenotype of subsequent generations. The effects of these stimuli on the**  
13 **parental generation may be passed through the germline, but the mechanisms**  
14 **of this non-Mendelian type of inheritance are poorly known. Here we show that**  
15 **modulation of nutrient-sensing pathways in the parental generation of a**  
16 **nematode (*Auanema freiburgensis*) regulates phenotypic plasticity of its**  
17 **offspring. In response to pheromones, AMP-activated protein kinase (AMPK),**  
18 **mechanistic target of rapamycin complex 1 (mTORC1) and insulin signaling**  
19 **regulate stress resistance and sex determination across a generation. The**  
20 **effectors of these pathways are closely associated with the chromatin and**  
21 **their regulation affects the acetylation chromatin status in the germline. These**  
22 **results suggest that highly conserved metabolic sensors regulate phenotypic**  
23 **plasticity by changing the epigenetic status of the germline.**

24

25

26 **INTRODUCTION**

27 The phenotype of an individual is the result of the interactions between its genome  
28 and the environment. However, the phenotype may also be influenced by  
29 experiences of the parents: parental environment, such as diet, may result in  
30 epigenetic changes in the germline that cause non-adaptive phenotypes in the  
31 offspring (Chen et al., 2016, Sharma et al., 2016). An example case in humans

32 suggests that famine increases the risk of metabolic defects in one or more  
33 generations (Kaati et al., 2007).

34

35 However, there are also mechanisms for passing information about the maternal  
36 environment to the offspring that increase fitness (Burton et al., 2017, Dantzer et al.,  
37 2013, Jablonka, 2013). This is referred to as adaptive phenotypic plasticity, which  
38 allows parents to match the phenotype of their offspring to changes in the local  
39 environment (West-Eberhard, 2003). For example, by sensing environmental cues,  
40 some animals can generate predator-resistant offspring (Agrawal et al., 1999,  
41 Gilbert, 2017), or stress-resistant offspring adapted to seasonal conditions  
42 (Mousseau and Dingle, 1991). Relatively little is known about mechanisms in which  
43 the parental generation senses the environment to induce adaptive phenotypic  
44 plasticity across one (intergenerational) or more generations (transgenerational)  
45 (Perez and Lehner, 2019).

46

47 Invertebrate model systems, such as the nematode *Caenorhabditis elegans*, have  
48 been instrumental in revealing some of the mechanisms of inter- and  
49 transgenerational inheritance (Miska and Ferguson-Smith, 2016, Perez and Lehner,  
50 2019). The free-living nematode *Auanema freiburgensis* is an attractive new animal  
51 model system for studying the mechanisms of inheritance of parental effects  
52 (Kanzaki et al., 2017, Zuco et al., 2018, Anderson et al., 2020). This is because the  
53 assays for studying the mechanisms of inheritance of parental effects in *A.*  
54 *freiburgensis* are fast and easy to perform due its short generation time (~4 days at  
55 20 °C) and easy-to-distinguish morphologies in the offspring.

56

57 *A. freiburgensis* produces three sexes, consisting of males, females and  
58 hermaphrodites (Kanzaki et al., 2017). The male of *A. freiburgensis* is determined  
59 genetically (XO), by mechanisms that will be addressed in a separate report. The  
60 hermaphrodite versus female sex (both XX) is determined by the environment  
61 experienced by the mother. Hermaphrodite individuals kept in isolation produce  
62 mostly female offspring, whereas hermaphrodites exposed to high population density  
63 conditions produce mostly hermaphrodite offspring (Fig. 1A).

64

65 Here we show that high-density population conditions experienced by the *A.*  
66 *freiburgensis* mother, a signal for imminent starvation, triggers the formation of F1  
67 dauer larvae. These dauers develop into hermaphrodite adults, while non-dauer  
68 larvae develop into female adults (or males). Pharmacological assays indicate that  
69 energy-sensing signaling mediated by AMP-activated protein kinase (AMPK),  
70 mechanistic target of rapamycin complex 1 (mTORC1), and insulin signaling are  
71 involved in intergenerational inheritance in *A. freiburgensis*. Effectors of these  
72 pathways are associated with chromatin, which changes the histone acetylation  
73 status in the germline chromatin to produce F1 dauers, which then develop into  
74 hermaphrodite adults.

75

## 76 **RESULTS**

77 A crucial factor in the development of *Auanema* hermaphrodites is the passage  
78 through the stress-resistant dauer stage (Félix, 2004, Chaudhuri et al., 2011,  
79 Kanzaki et al., 2017, Chaudhuri et al., 2015), which has morphological and  
80 behavioral adaptations for dispersal. In *A. freiburgensis*, all XX larvae that pass  
81 through the dauer stage become hermaphrodites (N= 96), whereas XX non-dauer  
82 larvae develop into females (N= 93). Similar to *A. rhodensis* (Chaudhuri et al., 2011)  
83 and other trioecious nematodes (Johnigk and Ehlers, 1999), we never observed *A.*  
84 *freiburgensis* males to undergo dauer formation. Thus, environmental stressors  
85 experienced by the maternal generation of *A. freiburgensis* are used as a signal to  
86 generate non-feeding offspring that can survive starvation conditions and reproduce  
87 by self-fertilization once food becomes available. In summary, these results suggest  
88 that dauer formation in *A. freiburgensis* is induced across a generation, instead of  
89 within the same generation as in *Caenorhabditis elegans* (Cassada and Russell,  
90 1975) (Figure 1B).

91

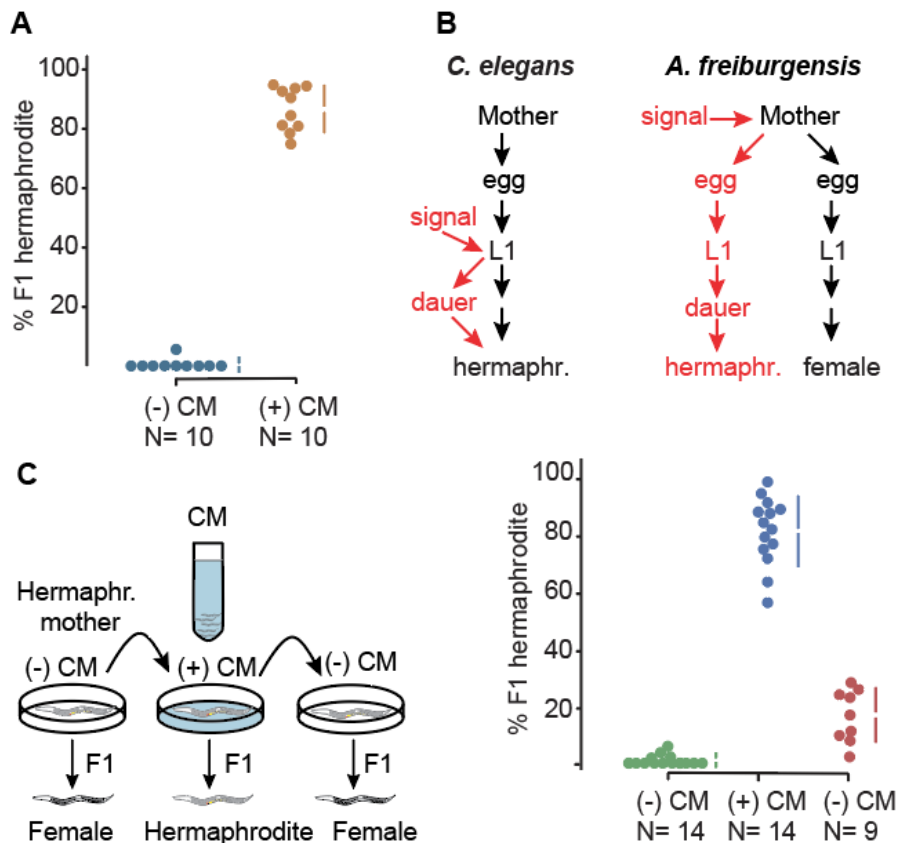

92

93 **Figure 1.** Dauer and hermaphrodite development are induced across generations in *A.*  
 94 *freiburgensis*. **A.** When hermaphrodite mothers are cultured in non-crowding conditions ((-)  
 95 CM), most of the XX F1s are female. (10 broods, from which a total of 149 F1s were scored).

96 When mothers are in crowding conditions ((+) CM), most of the XX F1s are hermaphrodites  
 97 (10 broods, with a total of 199 F1s scored). The data in colored dots represent the  
 98 percentage of F1 hermaphrodites in each brood and is plotted on the upper axes. The

99 colored vertical lines indicate  $\pm$  SD and the mean is represented as a gap in the lines. N=

100 sample size. **B.** In *C. elegans*, the L1 larvae respond to environmental signals to facultatively

101 form stress-resistant dauers. In *A. freiburgensis*, it is the mother and not the L1s that

102 respond to environmental signals. *A. freiburgensis* dauers obligatorily develop into

103 hermaphrodite adults. **C.** In the experimental setup (top), the same individual mother

104 hermaphrodite was transferred every 24 hours to a new environmental condition. Initially, it

105 was placed in a plate without conditioned medium (-) CM, followed by the transfer to a (+)

106 CM plate and then to a new (-) CM plate. The plot representation is the same as for Fig. 1A.

107 On the last day, 5 mothers died and thus only 9 broods were scored.

108

109 High population density conditions were induced by incubating *A. freiburgensis*

110 hermaphrodites with conditioned medium (CM) derived from liquid cultures

111 containing high nematode population densities (see Methods). Importantly, only the

112 parental generation was exposed to the CM. The induction of dauers through the  
113 hermaphrodite mother is limited to one generation: F1 hermaphrodites derived from  
114 mothers in (+) CM plates produce mostly female offspring (99.6% out of 470 F2  
115 offspring, scored from 10 broods). To test if *A. freiburgensis* L1 larvae can also  
116 respond to crowding conditions, eggs derived from mothers cultured in isolation were  
117 left to hatch and undergo larval development in (+) CM plates until adulthood. 95.7%  
118 (N= 161) of these L1s developed into females, indicating that larvae do not respond  
119 to crowding conditions. To investigate if other maternal environmental conditions  
120 affect the sexual fate of the F1s, mothers were incubated for 24-hours to high  
121 temperature (25 °C) or starvation. Most XX offspring (97%) developed into female  
122 adults for both conditions (166 F1s scored from mothers at 25 °C and 146 F1s  
123 scored from starving mothers). These results indicate that the conditioned medium is  
124 the only environmental stressor that induces intergenerational polyphenism in *A.*  
125 *freiburgensis* on its own.

126

127 To test the minimal population density sufficient for the induction of dauers and  
128 hermaphrodites across a generation, we incubated the maternal generation at  
129 different densities. When cultured for 6 hours, a minimum density of 16 adult  
130 hermaphrodites per cm<sup>2</sup> is sufficient for the induction of 100% (N= 295 F1s) of  
131 hermaphrodite offspring. In densities below 10 individuals/cm<sup>2</sup>, the hermaphrodite  
132 mothers produce only female offspring (10 individuals/cm<sup>2</sup>: 100% females, N= 78  
133 F1s; 6 individuals/cm<sup>2</sup>: 98.5% F1 female, N= 66 F1s). At an intermediate density (13  
134 individuals/cm<sup>2</sup>), hermaphrodites produce 19% (N= 126 F1s) of hermaphrodite  
135 offspring.

136

### 137 **Modulation of AMPK signaling changes hermaphrodite/female sex ratios in *A.*** 138 ***freiburgensis***

139 In eukaryotes, caloric restriction triggers the activation of AMP-activated protein  
140 kinase (AMPK) (Apfeld et al., 2004), a highly conserved energy sensor (Hardie et al.,  
141 2012). AMPK activity protects cells against the depletion of ATP by stimulating  
142 energy-producing pathways and inhibiting energy-consuming processes (Carling,  
143 2004). In *C. elegans*, AMPK is required for lifespan extension and germline viability  
144 when the nematode is in nutrient stress (Apfeld et al., 2004, Narbonne and Roy,  
145 2006, Fukuyama et al., 2012, Demoinet et al., 2017). The full kinase activity of

146 AMPK requires phosphorylation of threonine residue 172 (Thr172) by upstream  
147 kinases (Stein et al., 2000, Lee et al., 2008, Apfeld et al., 2004).

148

149 Since high population density is likely to result in imminent food scarcity, we  
150 reasoned that the AMPK pathway may be involved in intergenerational inheritance in  
151 *A. freiburgensis*. High population density conditions were induced by incubating *A.*  
152 *freiburgensis* hermaphrodites with conditioned medium (CM) of high population  
153 density liquid cultures (see Methods). We hypothesized that AMPK regulates target  
154 proteins in the maternal germline to influence the phenotype of the following  
155 generation. To test this hypothesis, we first tested the levels of an enzyme that  
156 activates AMPK, Liver Kinase B1 (LKB1). LKB1, known in *C. elegans* as PAR-4  
157 (Watts et al., 2000, Lee et al., 2008), phosphorylates and activates AMPK in the  
158 context of energy stress (Woods et al., 2003, Hawley et al., 2003). LKB1 is part of a  
159 complex with two proteins Ste20-related adaptor protein-alpha (STRAD) (Baas et al.,  
160 2003) and mouse protein 25-alpha (MO25alpha) (Boudeau et al., 2003). Antibody  
161 staining against LKB1 and STRAD showed a higher level of staining in the meiotic  
162 portion of the germline isolated from animals cultured in crowding conditions (Fig.  
163 2A, C, Supplemental Figure 1). Their localization was predominant in the cytoplasm  
164 of germline cells (Supplemental Figure 1).

165

166 To test the levels of AMPK, we used an antibody that detects the active,  
167 phosphorylated form of AMPK (AMPK pThr172). Consistent with the higher levels of  
168 LKB1 and STRAD, we also found that the anti-AMPK pThr172 staining was stronger  
169 in crowding conditions compared to control animals (Fig. 2 B-D). The difference in  
170 the level of staining was restricted to the meiotic region of the germline (Fig. 2, D)  
171 and the AMPK staining is closely associated with the chromatin of pachytene cells  
172 (Fig. 2D).

173

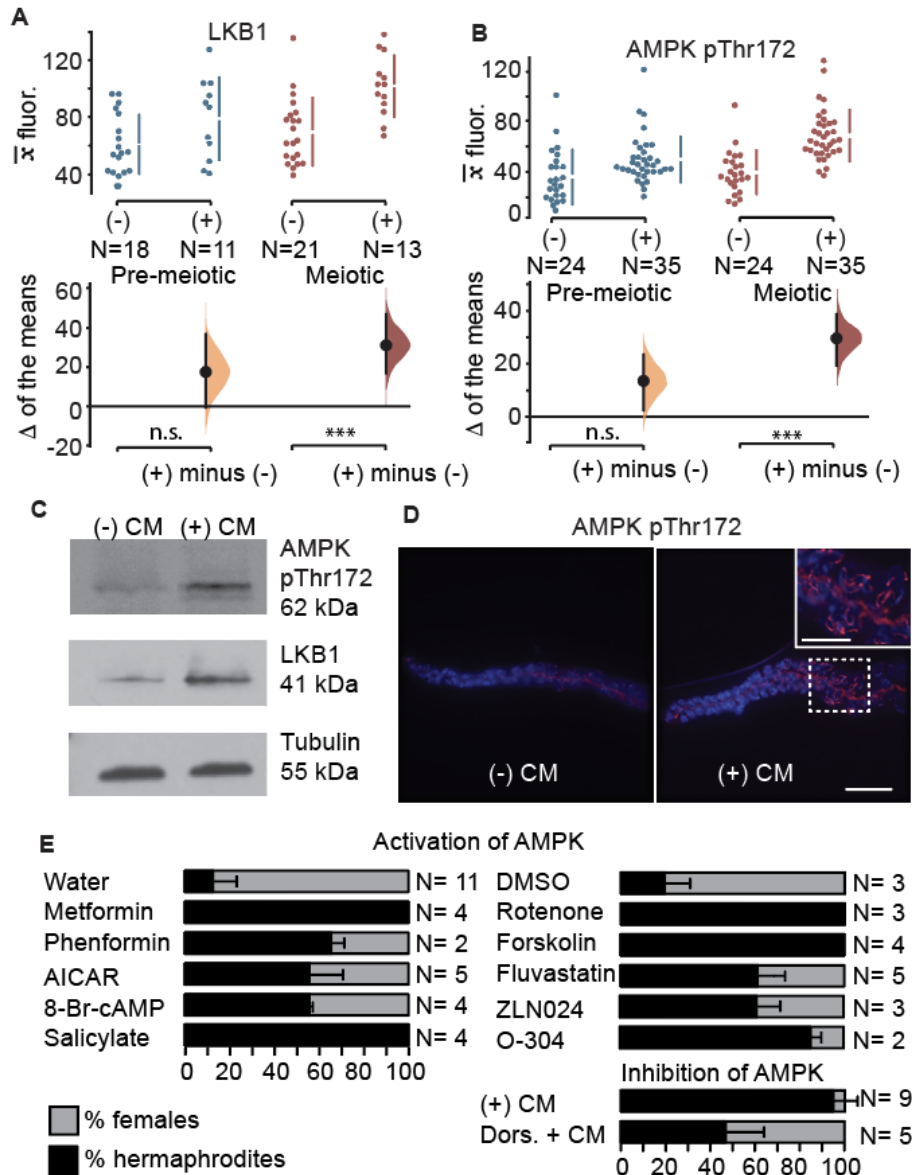

174

175 **Figure 2. AMPK pathway modulation in the *A. freiburgensis* germline.** (A, B) Mean  
 176 antibody fluorescence ( $\bar{x}$ ) in the pre-meiotic (blue) and meiotic portion (red) of the  
 177 germline, in the absence (-) or presence (+) of conditioned medium. N= sample sizes. The  
 178 mean difference for the two comparisons is shown as a Gardman-Altman estimation plot.  
 179 The raw data is plotted on the upper axes, with colored vertical lines indicating  $\pm$  95% CI,  
 180 and the mean is represented as a gap in the lines. Each difference of the means is plotted  
 181 on the lower axes as a bootstrap sampling distribution. The difference of the means is  
 182 depicted as a black dot and 95% confidence intervals are indicated by the black vertical error



183 bars. n.s.,  $p > 0.05$ ; \*\*\*=  $p \leq 0.001$ . (C) Western blots with proteins derived from  
184 hermaphrodites incubated in the absence (-) CM or presence (+) CM of conditioned medium.  
185 (D) AMPK pThr172 antibody staining of gonads dissected from hermaphrodites incubated in  
186 either (-) CM or (+) CM. Bar, 15  $\mu\text{m}$ . Insert in the right picture is a magnification from the  
187 region marked with a stippled square. Bar, 7.5  $\mu\text{m}$ . (E) Mean percentage and SD of  
188 hermaphrodite and female F1 offspring from hermaphrodites treated with chemicals. The  
189 control was either using water (left) or DMSO (right), depending on how the chemical  
190 compounds were dissolved. Dors.= Dorsomorphin. In all cases, diluted (1:10) CM was  
191 added to the medium, with exception to plates with dorsomorphin, which had undiluted CM.  
192 N= number of replicates.

193

194 To functionally test the role of AMPK in mediating intergenerational inheritance in *A.*  
195 *freiburgensis*, we used pharmacological compounds that modulate AMPK activity.  
196 We measured the effects of these compounds on intergenerational inheritance by  
197 scoring hermaphrodite and female sexes in the offspring. As mentioned previously,  
198 high population densities induce the production of dauer larvae in the F1, which  
199 mature to become hermaphrodite adults. Consistent with a role of AMPK in  
200 mediating this effect, we found that AMPK activators induce the production of  
201 hermaphrodites (Fig. 2E) (for a recent review on pharmacological activation of  
202 AMPK, see (Steinberg and Carling, 2019)). In most cases, these compounds cause  
203 changes in the F1 sex ratios when on their own (Supplemental Figure 2), but  
204 potentiation of their effects was significantly stronger when diluted CM (1:10 CM)  
205 was added to the culture medium. This may indicate that synergistic effects of  
206 different mechanisms are necessary to fully elicit a robust response, or that those  
207 energy-sensing pathways can be efficiently activated only when upstream events  
208 occur first.

209

210 Although the mechanisms of action are not clear for all pharmacological compounds,  
211 they can be broadly divided into indirect and direct AMPK activators. Any treatments  
212 that raise the AMP/ADP:ATP ratios are expected to indirectly activate AMPK. For  
213 instance, inhibition of mitochondrial respiration by metformin, phenformin and  
214 rotenone have been implicated in the activation of AMPK (El-Mir et al., 2000, Owen  
215 et al., 2000, Zhou et al., 2001, Sakamoto et al., 2004, Shaw et al., 2004, Huang et  
216 al., 2008, Toyama et al., 2016, Hou et al., 2018). Forskolin, an adenylate cyclase



217 activator, activates AMPK by increasing the cytosolic cAMP concentration (Seamon  
218 et al., 1983). Statins, such as fluvastatin (Xenos et al., 2005), have been proposed to  
219 activate AMPK. The incubation of mothers with all these compounds resulted in a  
220 higher proportion of hermaphrodite progeny (Fig. 2E).

221

222 Compounds that are similar to AMP can activate AMPK directly. 5-Aminoimidazole-  
223 4-carboxamide ribonucleotide (AICAR), for example, increases the activity of AMPK  
224 after being converted to an AMP analog inside the cell (Corton et al., 1995), whereas  
225 8-Br-cAMP is a non-hydrolyzable analog of cAMP (Hussey et al., 2017). Other  
226 compounds, such as the plant product salicylate (Hawley et al., 2012), and the  
227 synthetic compounds ZLN024 (Zhang et al., 2013) and O-304 (Steneberg et al.,  
228 2018) bind to AMPK, causing allosteric activation and inhibition of dephosphorylation  
229 of the pThr172. All these compounds induced a higher percentage of hermaphrodite  
230 offspring than controls (Fig. 2E). To inhibit AMPK, we used dorsomorphin (Zhou et  
231 al., 2001). As expected, hermaphrodites in CM with dorsomorphin resulted in a lower  
232 proportion of hermaphrodite progeny compared to controls (Fig. 2E).

233

### 234 **Maternal inhibition of mTORC1 signaling results in mostly hermaphrodite** 235 **offspring**

236 Since energy-sensing by AMPK induced intergenerational effects in *A. freiburgensis*,  
237 we hypothesized that other energy sensors may be involved in the same process.  
238 The intracellular nutrient sensor mTORC1 complex is a multisubunit kinase that  
239 senses growth signals and stimulates anabolism when nutrients are abundant  
240 (Kapahi et al., 2010, Ma and Blenis, 2009, Wullschleger et al., 2006, Zoncu et al.,  
241 2011, Laplante and Sabatini, 2012). Therefore, we would predict that in low  
242 population densities and readily available nutrients, the mTOR pathway would be  
243 active in *A. freiburgensis*. Under these conditions, *A. freiburgensis* produces mostly  
244 non-dauer larvae that later become female offspring. To investigate the kinase  
245 activity of mTORC1, we examined the expression of a well-characterized target  
246 protein, p70 S6K protein kinase (S6K) (Kapahi et al., 2010). Antibody staining  
247 against the phosphorylated form of S6K (S6K pThr389) was detected primarily in  
248 germline cells isolated from animals grown in low-density conditions (Fig. 3A-C).  
249 Most staining was associated with the chromatin, both in mitotic cells (Fig. 3A) and  
250 meiotic cells in late pachytene stages (Fig. 3B). Since AMPK and mTORC1 have

251 opposing actions (Hindupur et al., 2015), we hypothesized that treatment of animals  
252 with metformin, an activator of AMPK, would inhibit mTORC1 signaling. Consistent  
253 with this hypothesis, we found that treatment of animals with metformin resulted in a  
254 smaller number of cells stained with SK6 pThr389 (Fig. 3D).

255

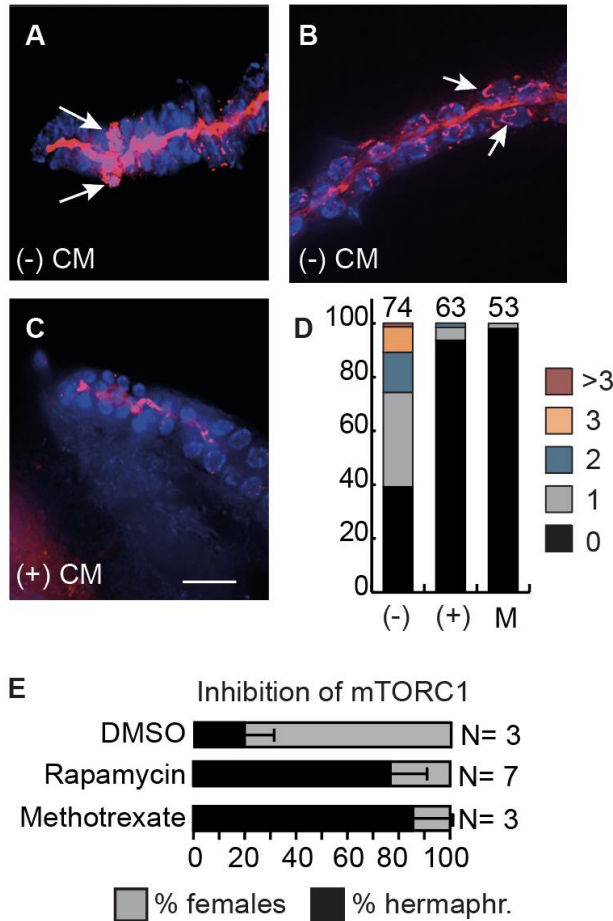

256

257 **Figure 3. mTOR signaling modulates intergenerational inheritance in *A. freiburgensis*.**

258 (A-C) Staining with S6K pThr389 antibody (red) and DAPI (blue) of dissected gonads from  
259 hermaphrodites incubated either in the absence ((-) CM) or in the presence ((+) CM) of  
260 conditioned medium. The arrows indicate cells marked with the antibody in the premeiotic  
261 region (A) and in the meiotic region (B), respectively. In (C), only the rachis has staining.  
262 Bar, 15  $\mu$ m. (D) Percentages of gonads with signal for S6K pThr389 antibody staining. The  
263 different colors represent the percentage of gonads with at 0, 1, 2, 3 or more than 3 cells  
264 stained in the premeiotic (PM) tip. Quantification was performed from gonads isolated from  
265 animals in the absence (-) or in the presence (+) of conditioned medium, and in the presence  
266 of metformin (M). The number of gonads analyzed is indicated on the top of the bars. (E)  
267 Mean percentage and SD of hermaphrodite and female F1 offspring from hermaphrodites

268 incubated with either DMSO or pharmacological compounds, together with some CM (1:10)  
269 CM. N= number of replicates.

270

271 To test the effect of modulating mTORC1 activity on sex ratios, we treated mothers  
272 with pharmacological compounds. Mothers treated with rapamycin (Heitman et al.,  
273 1991, Robida-Stubbs et al., 2012) produced a greater proportion of F1  
274 hermaphrodites than control mothers (Fig. 3E). mTORC1 signaling promotes nucleic  
275 acid synthesis, as long as nucleotide precursors are available (Hoxhaj et al., 2017).  
276 Treatment with methotrexate, a chemical that suppresses the *de novo* purine  
277 synthesis enzymes (Rajagopalan et al., 2002), inhibits mTORC1 activity. We found  
278 that *A. freiburgensis* hermaphrodites treated with methotrexate generated mostly  
279 hermaphrodite offspring (Fig. 3E). Altogether, these results indicate that mTOR  
280 signaling is involved in intergenerational inheritance in *A. freiburgensis*.

281

### 282 **Insulin signaling is downregulated in animals in crowding conditions**

283 The insulin signaling pathway regulates metabolism, development, and lifespan in a  
284 wide variety of animals. One of the regulators of the insulin pathway is a conserved  
285 phosphatase named PTEN (or DAF-18 in *C. elegans*)(Solari et al., 2005). To  
286 examine the regulation of the insulin pathway in *A. freiburgensis*, we used an  
287 antibody against PTEN/DAF-18 to stain isolated gonads from hermaphrodites  
288 cultured in low- and high- density conditions. We found that the antibody against  
289 PTEN/DAF-18 stained more strongly the germline when hermaphrodites were  
290 incubated in high-density conditions than in low-density populations (Fig. 4A,  
291 Supplemental Figure 3).

292

293 To test if PTEN/DAF-18 mediates the generation of hermaphrodites, we used the  
294 PTEN/DAF-18 inhibitors VO-OHpic (Rosivatz et al., 2006) and SF1670 (Li et al.,  
295 2011). When in the presence of conditioned medium from high-density populations,  
296 hermaphrodites treated with those inhibitors generated mostly female offspring (Fig.  
297 4B). Activation of PTEN/DAF-18 in hermaphrodites with the compound Indole-3-  
298 Carbinol under low population densities resulted in mostly hermaphrodites (Fig. 4B).

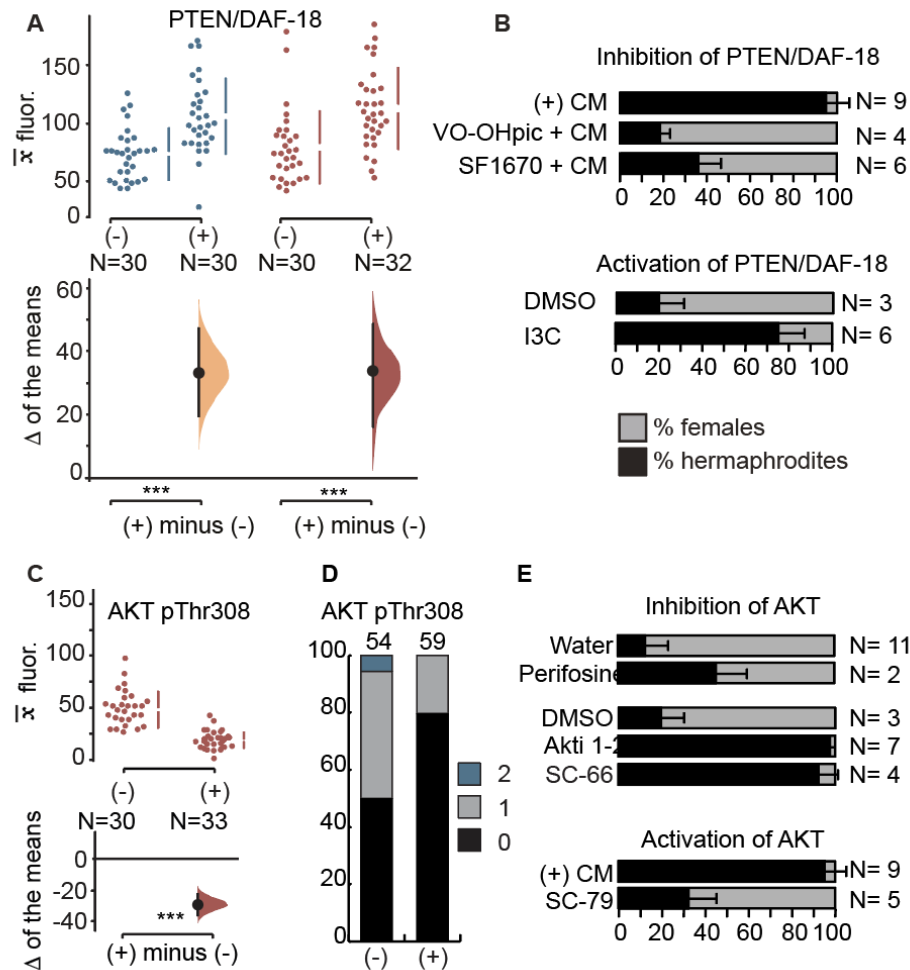

299

300 **Figure 4. Regulation of PTEN/DAF-18 and AKT.** (A) Quantification of antibody staining  
 301 with PTEN/DAF-18 in the maternal gonads. The representation and labeling of graphs are as  
 302 in Fig. 2A. (B) Mean percentage and SD of hermaphrodite and female F1 offspring from  
 303 hermaphrodites treated with chemicals that activate or inhibit PTEN/DAF-18. (+) CM  
 304 represents undiluted conditioned medium. The DMSO control and Indole-3-Carbinol (I3C)  
 305 incubations were performed with diluted (1:10) CM. N= number of replicates. (C)  
 306 Quantification of antibody staining for AKT pThr308 in the meiotic portion of the germline,  
 307 with representation as in (B). (D) Quantification of meiotic germline cells with staining with an  
 308 antibody against AKT pThr308, with graphical representation as in Fig. 3D. (E) Effect of  
 309 pharmacological inhibition or activation of AKT on sex ratios in the F1s.

310

311 One of the target proteins and effectors for insulin signaling is AKT kinase (also  
 312 known as PKB) (Paradis and Ruvkun, 1998), which among several anabolic  
 313 functions, also prevents chromatin condensation (Martelli et al., 2012, Manning and  
 314 Cantley, 2007, Manning and Toker, 2017). Maximal activation of AKT requires

315 phosphorylation at residues Thr308 and Ser473 (Alessi et al., 1996). Immunostaining  
316 with antibodies against AKT pThr308 (Fig. 4C, D, Supplemental Figure 4) revealed  
317 that staining is prominently associated with the chromatin in germline cells of animals  
318 grown under non-crowding conditions. No such association is seen when animals  
319 are in crowding conditions (Fig. 4C). The same pattern is seen for AKT pSer473  
320 (Supplemental Figure 4). Maternal inhibition of AKT with the chemicals perifosine  
321 (prevents activation of AKT by affecting its subcellular localization) (Kondapaka et  
322 al., 2003), Akti-1/2 (stabilizes the inactive conformation of AKT) (Barnett et al., 2005),  
323 and SC-66 (allosteric inhibitor of AKT) (Jo et al., 2011) results in a higher proportion  
324 of hermaphrodite progeny (Fig. 4E). On the other hand, activation of AKT with SC-79  
325 (Jo et al., 2012) prevents the generation of hermaphrodite progeny when the mother  
326 is in crowding conditions (Fig. 4E). Altogether, these results are consistent with the  
327 hypothesis that crowding conditions induce a lower insulin signaling, causing the  
328 production of hermaphrodite offspring.

329

### 330 **Changes in the maternal histone acetylation status modulate sex ratios in the** 331 **F1**

332 Energy-sensing pathways have been implicated in the regulation of acetylation of  
333 histones, histone modifiers, and cellular proteins (Salminen et al., 2016). To examine  
334 if acetylation patterns change in the germline when *A. freiburgensis* is in high  
335 population densities, we compared the level of antibody staining in gonads isolated  
336 from hermaphrodites cultured in the absence or presence of CM. Antibody staining  
337 against acetylated residues on histones 3 and 4 was at higher levels in the germline  
338 derived from animals cultured in the presence of CM compared to controls, both for  
339 premeiotic and meiotic portions (Fig. 5A-B, Supplemental Figure 5). The same trend  
340 was observed when using an antibody that binds to all acetylated proteins (pan-  
341 LysAc), although differences were detected only for the premeiotic portion of the  
342 germline (Fig. 5C).

343 To test if modulation of acetylation levels causes changes in sex ratios, we induced  
344 hyperacetylation by treating *A. freiburgensis* hermaphrodites with the histone  
345 deacetylase inhibitors SRT1720 (Zarse et al., 2010, Milne et al., 2007), Trichostatin  
346 A (Yoshida et al., 1990), Valproic Acid (Evason et al., 2008, Forthun et al., 2012), D-

347  $\beta$ -hydroxybutyrate (Edwards et al., 2014), Butyrate (Zhang et al., 2009) and EX-527  
 348 (Solomon et al., 2006). In all cases, more hermaphrodites than females were  
 349 produced relative to control (Fig. 5D). By contrast, incubating the mothers in high-  
 350 density conditions together with the inhibitor of acetylation 4-tert-butylbenzoic acid  
 351 (Chen et al., 2014) resulted in less hermaphrodite offspring (Fig. 5D).

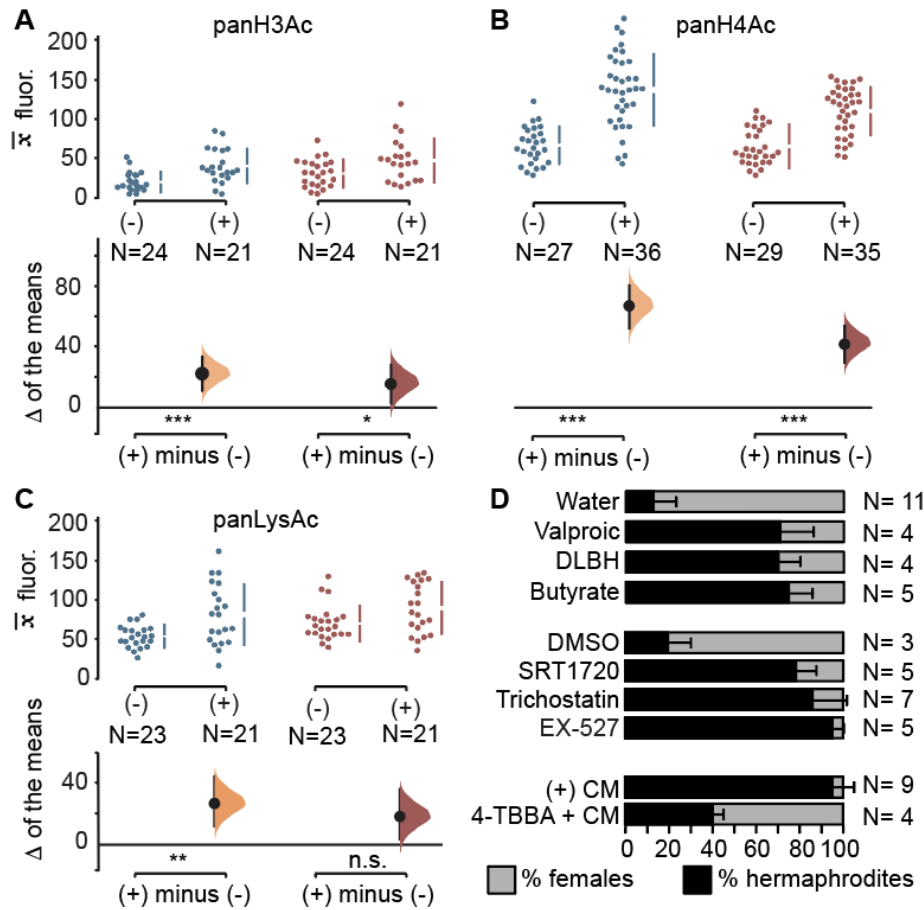

352  
 353 **Figure 5. Regulation of acetylation levels.** Mean antibody fluorescence ( $x_{\_}$ ) for panH3Ac  
 354 (A), panH4Ac (B) and panLysAc (C) in the pre-meiotic (blue) and meiotic portion (red) of the  
 355 germline, in the absence (-) or presence (+) of conditioned medium. N= sample sizes. The P  
 356 values are calculated from a Mann-Whitney test (U): n.s.,  $p > 0.05$ ; \* =  $p \leq 0.05$ ; \*\* =  $p \leq 0.01$ ;  
 357 \*\*\*=  $p \leq 0.001$ . (D) Mean percentage and SD of hermaphrodite and female F1 offspring from  
 358 hermaphrodites treated with chemicals. DLBH: DL- $\beta$  hydroxybutyrate; TBBA: 4-tert-  
 359 butylbenzoic acid. (1:10) CM was added to the medium, except plates with 4-TBBA, which  
 360 had undiluted CM. N= number of replicates.  
 361



## 362 DISCUSSION

363

364 *Auanema* nematodes have been isolated from similar environments as *C. elegans*  
365 (Félix and Duveau, 2012), which consists of ephemeral habitats with microbe-rich  
366 organic decomposing matter (Schulenburg and Felix, 2017, Kanzaki et al., 2017).  
367 Due to rapid population growth and quick depletion of resources, the ecology of  
368 these nematodes is characterized by a boom and bust population dynamics. In  
369 contrast to *C. elegans*, the developmental and phenotypic response to stress in *A.*  
370 *freiburgensis* occurs across a generation instead of within the same generation:  
371 maternal sensing of pheromones secreted by conspecifics induces the production of  
372 stress- and starvation-resistant dauer larvae. This indicates that the *A. freiburgensis*  
373 mother can predict the environmental conditions to which the offspring is likely to be  
374 exposed, and adjusts the F1 phenotype (dauer larvae) to temporarily survive in the  
375 absence of food. The *Auanema* dauers have migratory behaviors and always  
376 develop into selfing hermaphrodites (Kanzaki et al., 2017). By producing dauers that  
377 develop into hermaphrodites, a new population can be established even when the  
378 colonizing event is mediated by a single individual (Baker, 1955). This type of  
379 intergenerational inheritance, in which parental effects increase the fitness of both  
380 offspring and parents, has hallmarks for being adaptive (Uller, 2008).

381

382 Here we show that activators of AMPK and insulin signaling activators or mTORC1  
383 inhibitors can mimic the exposure of *A. freiburgensis* to pheromones. These results  
384 indicate that highly conserved energy-sensing pathways are involved in mediating  
385 intergenerational inheritance in *A. freiburgensis* to generate stress-resistant  
386 offspring. How exactly do these energy-sensing pathways regulate phenotypic  
387 plasticity in the F1s? One possible mechanism is the direct regulation of the  
388 chromatin status in the maternal germline by the energy-sensing enzymes. Thus,  
389 activation of transcription of specific genes in the germline may determine the  
390 phenotype of the following generation. AMPK, for instance, has been shown to  
391 phosphorylate histones, which results in the activation of transcription (Bungard et  
392 al., 2010). Consistent with this, we found that protein levels increase for the activated  
393 form of AMPK when *A. freiburgensis* is under crowding conditions and is detected in  
394 close association with the chromatin of germline cells. By phosphorylating histones,



395 AMPK has been shown to facilitate histone acetylation (Lo et al., 2001), thus  
396 promoting the transcription of a new set of genes (Lee et al., 1993).

397

398 Alternatively, AMPK may indirectly influence the chromatin status via activation of  
399 histone acetyltransferases (HATs) or inactivation of histone deacetyltransferases  
400 (HDAC), as demonstrated for other model systems (Shimazu et al., 2013, Yang et  
401 al., 2001). In *A. freiburgensis*, higher acetylation levels in the chromatin of the  
402 germline induced by crowding conditions results in stress-resistant offspring (Fig. 5).  
403 It remains to be established whether these acetylation levels are the result of direct  
404 phosphorylation of HATs and HDACs by AMPK, or indirectly by natural metabolites.  
405 As we show in Fig. 5D, natural metabolites indicative of metabolic stress that inhibit  
406 deacetyltransferases, such as D- $\beta$ -hydroxybutyrate and butyrate (Shimazu et al.,  
407 2013), induce the production of stress-resistant offspring.

408

409 The strongest responses to the pharmacological compounds for the production of  
410 hermaphrodite progeny occurred when the animals were concomitantly exposed to  
411 diluted CM. In the complete absence of CM, only a few compounds elicited a strong  
412 response. This may indicate that pheromones in the CM activate more than one  
413 pathway and that they have to act in combination to elicit the full effect. Our findings  
414 that several energy-sensing pathways are involved in this process in *A.*  
415 *freiburgensis*, and that AMPK, insulin and TOR pathways are cross-regulated, are  
416 indicative of this hypothesis (González et al., 2020, Ruderman et al., 2010, Banerjee  
417 et al., 2016).

418

419 The concentration of the compounds used in our studies are relatively high  
420 compared to the ones used in mammalian cells (Burns et al., 2006). This is because  
421 nematodes have several physical and physiological adaptations that counteract  
422 xenobiotic agents (Burns et al., 2010). Like all pharmacological approaches,  
423 interpretation of the results must take into consideration possible lack of specificity  
424 (Corton et al., 1995, Longnus et al., 2003, Bain et al., 2007, Pacholec et al., 2010).  
425 To ameliorate the possibility of lack of specificity for AMPK activation, for instance,  
426 we used compounds that act through several mechanisms (high production of AMP,  
427 allosteric binding, protection against dephosphorylation, activation of

428 phosphorylation). Genetic approaches using loss- and gain-of-function mutants will  
429 help to address some of the above-mentioned concerns (Adams et al., 2019).

430

431 As far as we know, the association of activated AMPK and S6K with the chromatin of  
432 germline cells has not been established in other organisms. The presence of AKT in  
433 the nucleus of germline cells may be associated with chromatin condensation, which  
434 would be reflected in transcription rates (Martelli et al., 2012). Our results indicate  
435 that these energy-sensing effectors acquired a new role in intergenerational  
436 inheritance in *A. freiburgensis* to regulate gene expression that influences the  
437 phenotype of subsequent generations. Given that AMPK, TOR, and insulin pathways  
438 are highly conserved in evolution, it is possible that they also mediate non-genetic  
439 inheritance via the germline in other organisms in which diet plays a role in  
440 determining phenotypic plasticity. Although the epidemiological studies in humans  
441 are indicative of diet playing such a role, the mechanisms for this are unknown  
442 (Horsthemke, 2018). The findings in this study provide the basis to test such a  
443 hypothesis.

444

445

446

447

#### 448 **ACKNOWLEDGMENTS**

449 This work was supported by Leverhulme Trust (RPG-2019-329). A.T. was funded by  
450 the Doctoral Training Program from Natural Environment Research Council (NERC  
451 CENTA) and P. P. was funded by the Doctoral Training from BBSRC (Midlands  
452 Integrative Biosciences Training Partnership). The authors would like to  
453 acknowledge the help of the Media Preparation Facility in The School of Life  
454 Sciences at the University of Warwick. Bacteria strains were provided by the CGC,  
455 which is funded by NIH Office of Research Infrastructure Programs (P40  
456 OD010440).

457

#### 458 **AUTHOR CONTRIBUTIONS**

459 P.R., G.Z., V.K., and A.P.-d.S. designed the study. P.R., A.T., G.Z, V.K., P.P., B.H.,  
460 C.B. and B.H. conducted experiments that involved the production of conditioned  
461 medium, incubation with chemicals, and sexing offspring. P.R. performed the  
462 immunocytochemistry experiments and P. P. performed the Western blots. P.R. and  
463 A.P.-d.S. wrote the paper.

## 464 AUTHOR INFORMATION

465 The authors declare no competing interests.

466

## 467 MATERIAL AND METHODS

### 468 ***Strain and culture***

469 We used the *Caenorhabditis elegans* N2 strain, and the *Auanema freiburgensis*  
470 strains SB372 (Kanzaki et al., 2017) and JU1782. The *A. freiburgensis* JU1782 strain  
471 was isolated from rotting *Petasites* stems sampled in Ivry, Val-de-Marne, France, in  
472 September 2009 by Marie-Anne Félix. Nematodes were cultured at 20 °C on  
473 standard Nematode Growth Medium (NGM) (Stiernagle, 2006) plates seeded with  
474 *Escherichia coli* OP50-1 strain. NGM medium was supplemented with 25 µg/mL  
475 nystatin and 50 µg/mL streptomycin to prevent microbial contamination.

476

### 477 ***Sexing of progeny***

478 To synchronize the age of the mothers, we collected dauers. *A. freiburgensis* dauers  
479 develop into hermaphrodite adults within 24 hours at 20 °C (Kanzaki et al., 2017).  
480 Dauer larvae are easily identified by their darker intestine and thinner body  
481 compared to similar-sized L3 larvae (which develop into females). Each dauer larva  
482 was placed on a 6 cm seeded NGM plate and incubated at 20 °C to develop into  
483 adulthood. Each egg laid by the parental (P0) generation was placed into single  
484 wells of a 96-well microtiter plate. After 3-5 days, the F1 was scored for their sex:  
485 hermaphrodites were identified by their ability to produce offspring in the absence of  
486 a mating partner, females by the lack of progeny, and males by their blunt tails  
487 (Kanzaki et al., 2017). We calculated sex percentages based only on non-male  
488 progeny (hermaphrodites or females). This is because males are not determined by

489 environmental cues, but by sex chromosome number. Raw data used to calculate  
490 sex percentages are at <https://figshare.com/s/48b14ef15a76acc5405d>.

491

### 492 **Assay with conditioned medium and treatment with pharmacological chemical** 493 **compounds**

494 To induce *A. freiburgensis* hermaphrodite offspring, the parent hermaphrodites (P0  
495 generation) were incubated in the presence of conditioned medium (CM) at 20 °C  
496 (Zuco et al., 2018). The CM was derived from 2-3 week old *A. freiburgensis* liquid  
497 cultures (M9 medium with *E. coli* OP50-1). Each P0 was placed at the L4 stage onto  
498 a 6 cm plate containing NGM and CM. To simulate high-density conditions, 50 mg of  
499 lyophilized CM were dissolved in 200 µl of an overnight culture of OP50-1 and  
500 spotted onto the plate. F1 eggs were collected for 3-4 days. Each egg was  
501 transferred into a single well of a 48-well microtiter plate containing NGM and OP50-  
502 1, but no conditioned medium.

503

504 For the pharmacological manipulation of signaling pathways, we added compounds  
505 to the NGM and OP50-1. The concentration of the compounds was calculated for the  
506 volume of the NGM and OP50-1 used. P0 hermaphrodites were incubated with the  
507 compounds for 48-36 h at 20 °C. Information about the providers and catalog  
508 number for the compounds used in this study are listed in

509 <https://figshare.com/s/48b14ef15a76acc5405d>.

510 Chemical compounds were used at the following concentrations: 100 mM Metformin,  
511 6 mM Phenformin, 1 µM Rotenone, 5 µM Forskolin, 30 µM Fluvastatin, 0.5 mM  
512 AICAR, 0.5 mM 8-Br-cAMP, 5 mM Salicylate, 10 µM ZLN204, 30 µM O-304, 1 µM  
513 Dorsomorphin, 100 µM Rapamycin, 100 µM Methotrexate, 100 nM VO-OHpic, 20 µM  
514 Indole-3-Carbinol, 10 µM SRT1720, 100 µM Trichostatin A, 4 mM Valproic Acid, 5  
515 mM DL-beta hydroxybutyrate, 5 mM sodium butyrate, 100 µM EX-527, 3 mM 4-tert-  
516 butylbenzoic acid, 75 nM SC-66, 300 nM Akti-1/2, 20 µM perifosine, and 10 nM SC-  
517 79. For nematodes incubated with diluted CM, we used 5 mg of freeze-dried CM  
518 dissolved in 200 µl *E. coli* OP50-1.

519

### 520 **Immunohistochemistry**

521 Hermaphrodites were dissected on a slide (Superfrost microscope slide, VWR) in  
522 PBS 1X buffer. Dissected gonads were covered by a coverslip and placed on a  
523 frozen metal block at -20 °C for at least 10 minutes, and fixed for 2 minutes in a 95%  
524 methanol solution at -20 °C. This was followed by 30 minutes in a fixative solution  
525 [PBS 1X, 80 mM HEPES (pH= 7.0-7.4), 1.6 mM MgSO<sub>4</sub>, 0.8 mM EDTA (pH=8.0),  
526 4% paraformaldehyde] in a humid chamber at room temperature. Slides were  
527 washed twice with PBST (PBS + 0.1% Triton X-100) for 5 minutes and blocked in  
528 PBST + 0.5% BSA for 45-60 minutes. The source of primary and secondary  
529 antibodies, as well as dilutions used, are listed in  
530 <https://figshare.com/s/48b14ef15a76acc5405d>. All antibodies were diluted in PBST.  
531 Incubation with the primary antibodies was performed at 4 °C overnight. Slides were  
532 then washed twice in PBST for 10 minutes each and the corresponding secondary  
533 antibody was added and incubated for 2 hours at room temperature. Slides were  
534 washed in PBST as above to remove the excess of the secondary antibody and then  
535 one drop of Fluoroshield Mounting Medium with 4',6-diamidino-2-phenylindole  
536 (DAPI) (Abcam, #ab104139) was added on the immunostained samples.

537

538 Images were taken with a 60X objective in 2.40 µm z-stack intervals (12 sections)  
539 with a DeltaVision microscope (Olympus). Acquisition and constrained iterative  
540 deconvolution of the images from DeltaVision were processed using the softWoRx  
541 software (Applied Precision). The intensity of fluorescence for the secondary  
542 antibodies was measured using the ImageJ software (NIH Image, Bethesda, MD).

543

#### 544 **Western blot**

545 Protein extraction and buffer preparation were performed following the protocol of  
546 (Jeong et al., 2018). Six hundred adult hermaphrodites were collected for each  
547 sample: control (OP50-1 only) and experimental (50 mg conditioned medium powder  
548 per 200 µl of OP50-1) samples. Protein concentration was measured using Bradford  
549 assay (Bradford Reagent, Bio-Rad). We loaded approximately 100 µg of protein. The  
550 primary antibodies, against Phospho-AMPKα (Thr172) and PAR-4/LKB1, were used  
551 at 1:1000 dilution. The source of primary and secondary antibodies, as well as  
552 dilutions used for them, are listed in <https://figshare.com/s/48b14ef15a76acc5405d>.  
553 To detect the signal for the antibodies, we used the Amersham™ ECL™ Western  
554 Blotting Detection Reagents (RPN2209).

555

## 556 **Statistical analyses**

557 Results were presented using the most recent developments in data analysis and  
558 presentation (Ho et al., 2019), showing the raw data as 'bee swarm' plots. They  
559 summarize the data showing the mean and the 95% confidence interval (CI), as well  
560 as the sampling error distribution diagrammed as a filled curve. These plots provide  
561 transparency of the comparison being made, visual clarity and statistical evaluation  
562 of the data.

563

564

## 565 **References**

- 566 ADAMS, S., PATHAK, P., SHAO, H., LOK, J. B. & PIRES-DASILVA, A. 2019. Liposome-  
567 based transfection enhances RNAi and CRISPR-mediated mutagenesis in non-  
568 model nematode systems. *Sci Rep*, 9, 483.
- 569 AGRAWAL, A. A., LAFORSCH, C. & TOLLRIAN, R. 1999. Transgenerational induction of  
570 defences in animals and plants. *Nature*, 401, 60-63.
- 571 ALESSI, D. R., ANDJELKOVIC, M., CAUDWELL, B., CRON, P., MORRICE, N., COHEN, P.  
572 & HEMMINGS, B. A. 1996. Mechanism of activation of protein kinase B by insulin  
573 and IGF-1. *EMBO J*, 15, 6541-51.
- 574 ANDERSON, A. G., BUBRIG, L. T. & FIERST, J. L. 2020. Environmental stress maintains  
575 trioecy in nematode worms. *Evolution*, 74, 518-527.
- 576 APFELD, J., O'CONNOR, G., MCDONAGH, T., DISTEFANO, P. S. & CURTIS, R. 2004. The  
577 AMP-activated protein kinase AAK-2 links energy levels and insulin-like signals to  
578 lifespan in *C. elegans*. *Genes Dev*, 18, 3004-9.
- 579 BAAS, A. F., BOUDEAU, J., SAPKOTA, G. P., SMIT, L., MEDEMA, R., MORRICE, N. A.,  
580 ALESSI, D. R. & CLEVERS, H. C. 2003. Activation of the tumour suppressor kinase  
581 LKB1 by the STE20-like pseudokinase STRAD. *EMBO J*, 22, 3062-72.
- 582 BAIN, J., PLATER, L., ELLIOTT, M., SHPIRO, N., HASTIE, C. J., MCLAUCHLAN, H.,  
583 KLEVERNIC, I., ARTHUR, J. S., ALESSI, D. R. & COHEN, P. 2007. The selectivity  
584 of protein kinase inhibitors: a further update. *Biochem J*, 408, 297-315.
- 585 BAKER, H. G. 1955. Self-compatibility and establishment after "long distance" dispersal.  
586 *Evolution*, 9, 347-348.
- 587 BANERJEE, J., BRUCKBAUER, A. & ZEMEL, M. B. 2016. Activation of the AMPK/Sirt1  
588 pathway by a leucine-metformin combination increases insulin sensitivity in skeletal  
589 muscle, and stimulates glucose and lipid metabolism and increases life span in  
590 *Caenorhabditis elegans*. *Metabolism*, 65, 1679-1691.
- 591 BARNETT, S. F., DEFEO-JONES, D., FU, S., HANCOCK, P. J., HASKELL, K. M., JONES,  
592 R. E., KAHANA, J. A., KRAL, A. M., LEANDER, K., LEE, L. L., MALINOWSKI, J.,  
593 MCAVOY, E. M., NAHAS, D. D., ROBINSON, R. G. & HUBER, H. E. 2005.  
594 Identification and characterization of pleckstrin-homology-domain-dependent and  
595 isoenzyme-specific Akt inhibitors. *Biochem J*, 385, 399-408.
- 596 BOUDEAU, J., BAAS, A. F., DEAK, M., MORRICE, N. A., KIELOCH, A., SCHUTKOWSKI,  
597 M., PRESCOTT, A. R., CLEVERS, H. C. & ALESSI, D. R. 2003. MO25alpha/beta  
598 interact with STRADalpha/beta enhancing their ability to bind, activate and localize  
599 LKB1 in the cytoplasm. *EMBO J*, 22, 5102-14.
- 600 BUNGARD, D., FUERTH, B. J., ZENG, P. Y., FAUBERT, B., MAAS, N. L., VIOLLET, B.,  
601 CARLING, D., THOMPSON, C. B., JONES, R. G. & BERGER, S. L. 2010. Signaling



- 602 kinase AMPK activates stress-promoted transcription via histone H2B  
603 phosphorylation. *Science*, 329, 1201-5.
- 604 BURNS, A. R., KWOK, T. C., HOWARD, A., HOUSTON, E., JOHANSON, K., CHAN, A.,  
605 CUTLER, S. R., MCCOURT, P. & ROY, P. J. 2006. High-throughput screening of  
606 small molecules for bioactivity and target identification in *Caenorhabditis elegans*.  
607 *Nat Protoc*, 1, 1906-14.
- 608 BURNS, A. R., WALLACE, I. M., WILDENHAIN, J., TYERS, M., GIAEVER, G., BADER, G.  
609 D., NISLOW, C., CUTLER, S. R. & ROY, P. J. 2010. A predictive model for drug  
610 bioaccumulation and bioactivity in *Caenorhabditis elegans*. *Nat Chem Biol*, 6, 549-57.
- 611 BURTON, N. O., FURUTA, T., WEBSTER, A. K., KAPLAN, R. E. W., BAUGH, L. R., ARUR,  
612 S. & HORVITZ, H. R. 2017. Insulin-like signalling to the maternal germline controls  
613 progeny response to osmotic stress. *Nature Cell Biology*, 19, 252.
- 614 CARLING, D. 2004. The AMP-activated protein kinase cascade--a unifying system for  
615 energy control. *Trends Biochem Sci*, 29, 18-24.
- 616 CASSADA, R. C. & RUSSELL, R. L. 1975. The dauerlarva, a post-embryonic developmental  
617 variant of the nematode *Caenorhabditis elegans*. *Dev Biol*, 46, 326-42.
- 618 CHAUDHURI, J., BOSE, N., TANDONNET, S., ADAMS, S., ZUCO, G., KACHE, V.,  
619 PARIHAR, M., VON REUSS, S. H., SCHROEDER, F. C. & PIRES-DASILVA, A.  
620 2015. Mating dynamics in a nematode with three sexes and its evolutionary  
621 implications. *Sci Rep*, 5, 17676.
- 622 CHAUDHURI, J., KACHE, V. & PIRES-DASILVA, A. 2011. Regulation of sexual plasticity in  
623 a nematode that produces males, females, and hermaphrodites. *Curr Biol*, 21, 1548-  
624 51.
- 625 CHEN, Q., YAN, M., CAO, Z., LI, X., ZHANG, Y., SHI, J., FENG, G. H., PENG, H., ZHANG,  
626 X., ZHANG, Y., QIAN, J., DUAN, E., ZHAI, Q. & ZHOU, Q. 2016. Sperm tsRNAs  
627 contribute to intergenerational inheritance of an acquired metabolic disorder.  
628 *Science*, 351, 397-400.
- 629 CHEN, Y. P., CATBAGAN, C. C., BOWLER, J. T., GOKEY, T., GOODWIN, N. D., GULIAEV,  
630 A. B., WU, W. & AMAGATA, T. 2014. Evaluation of benzoic acid derivatives as sirtuin  
631 inhibitors. *Bioorg Med Chem Lett*, 24, 349-52.
- 632 CORTON, J. M., GILLESPIE, J. G., HAWLEY, S. A. & HARDIE, D. G. 1995. 5-  
633 aminoimidazole-4-carboxamide ribonucleoside. A specific method for activating  
634 AMP-activated protein kinase in intact cells? *Eur J Biochem*, 229, 558-65.
- 635 DANTZER, B., NEWMAN, A. E., BOONSTRA, R., PALME, R., BOUTIN, S., HUMPHRIES,  
636 M. M. & MCADAM, A. G. 2013. Density triggers maternal hormones that increase  
637 adaptive offspring growth in a wild mammal. *Science*, 340, 1215-7.
- 638 DEMOINET, E., LI, S. & ROY, R. 2017. AMPK blocks starvation-inducible transgenerational  
639 defects in *Caenorhabditis elegans*. *Proc Natl Acad Sci U S A*, 114, E2689-E2698.
- 640 EDWARDS, C., CANFIELD, J., COPES, N., REHAN, M., LIPPS, D. & BRADSHAW, P. C.  
641 2014. D-beta-hydroxybutyrate extends lifespan in *C. elegans*. *Aging (Albany NY)*, 6,  
642 621-44.
- 643 EL-MIR, M. Y., NOGUEIRA, V., FONTAINE, E., AVERET, N., RIGOULET, M. & LEVERVE,  
644 X. 2000. Dimethylbiguanide inhibits cell respiration via an indirect effect targeted on  
645 the respiratory chain complex I. *J Biol Chem*, 275, 223-8.
- 646 EVASON, K., COLLINS, J. J., HUANG, C., HUGHES, S. & KORNFELD, K. 2008. Valproic  
647 acid extends *Caenorhabditis elegans* lifespan. *Aging Cell*, 7, 305-17.
- 648 FÉLIX, M. A. 2004. Alternative morphs and plasticity of vulval development in a rhabditid  
649 nematode species. *Dev Genes Evol*, 214, 55-63.
- 650 FÉLIX, M. A. & DUVEAU, F. 2012. Population dynamics and habitat sharing of natural  
651 populations of *Caenorhabditis elegans* and *C. briggsae*. *BMC Biol*, 10, 59.
- 652 FORTHUN, R. B., SENGUPTA, T., SKJELDAM, H. K., LINDVALL, J. M., MCCORMACK, E.,  
653 GJERTSEN, B. T. & NILSEN, H. 2012. Cross-species functional genomic analysis  
654 identifies resistance genes of the histone deacetylase inhibitor valproic acid. *PLoS*  
655 *One*, 7, e48992.



- 656 FUKUYAMA, M., SAKUMA, K., PARK, R., KASUGA, H., NAGAYA, R., ATSUMI, Y.,  
657 SHIMOMURA, Y., TAKAHASHI, S., KAJIHO, H., ROUGVIE, A., KONTANI, K. &  
658 KATADA, T. 2012. C. elegans AMPKs promote survival and arrest germline  
659 development during nutrient stress. *Biol Open*, 1, 929-36.
- 660 GILBERT, J. J. 2017. Non-genetic polymorphisms in rotifers: environmental and  
661 endogenous controls, development, and features for predictable or unpredictable  
662 environments. *Biol Rev Camb Philos Soc*, 92, 964-992.
- 663 GONZÁLEZ, A., HALL, M. N., LIN, S.-C. & HARDIE, D. G. 2020. AMPK and TOR: The Yin  
664 and Yang of Cellular Nutrient Sensing and Growth Control. *Cell Metabolism*, 31, 472-  
665 492.
- 666 HARDIE, D. G., ROSS, F. A. & HAWLEY, S. A. 2012. AMPK: a nutrient and energy sensor  
667 that maintains energy homeostasis. *Nat Rev Mol Cell Biol*, 13, 251-62.
- 668 HAWLEY, S. A., BOUDEAU, J., REID, J. L., MUSTARD, K. J., UDD, L., MAKELA, T. P.,  
669 ALESSI, D. R. & HARDIE, D. G. 2003. Complexes between the LKB1 tumor  
670 suppressor, STRAD alpha/beta and MO25 alpha/beta are upstream kinases in the  
671 AMP-activated protein kinase cascade. *J Biol*, 2, 28.
- 672 HAWLEY, S. A., FULLERTON, M. D., ROSS, F. A., SCHERTZER, J. D., CHEVTZOFF, C.,  
673 WALKER, K. J., PEGGIE, M. W., ZIBROVA, D., GREEN, K. A., MUSTARD, K. J.,  
674 KEMP, B. E., SAKAMOTO, K., STEINBERG, G. R. & HARDIE, D. G. 2012. The  
675 ancient drug salicylate directly activates AMP-activated protein kinase. *Science*, 336,  
676 918-22.
- 677 HEITMAN, J., MOVVA, N. R. & HALL, M. N. 1991. Targets for cell cycle arrest by the  
678 immunosuppressant rapamycin in yeast. *Science*, 253, 905-9.
- 679 HINDUPUR, S. K., GONZALEZ, A. & HALL, M. N. 2015. The opposing actions of target of  
680 rapamycin and AMP-activated protein kinase in cell growth control. *Cold Spring Harb*  
681 *Perspect Biol*, 7, a019141.
- 682 HO, J., TUMKAYA, T., ARYAL, S., CHOI, H. & CLARIDGE-CHANG, A. 2019. Moving  
683 beyond P values: data analysis with estimation graphics. *Nat Methods*, 16, 565-566.
- 684 HORSTHEMKE, B. 2018. A critical view on transgenerational epigenetic inheritance in  
685 humans. *Nat Commun*, 9, 2973.
- 686 HOU, W. L., YIN, J., ALIMUJIANG, M., YU, X. Y., AI, L. G., BAO, Y. Q., LIU, F. & JIA, W. P.  
687 2018. Inhibition of mitochondrial complex I improves glucose metabolism  
688 independently of AMPK activation. *J Cell Mol Med*, 22, 1316-1328.
- 689 HOXHAI, G., HUGHES-HALLETT, J., TIMSON, R. C., ILAGAN, E., YUAN, M., ASARA, J.  
690 M., BEN-SAHRA, I. & MANNING, B. D. 2017. The mTORC1 Signaling Network  
691 Senses Changes in Cellular Purine Nucleotide Levels. *Cell Rep*, 21, 1331-1346.
- 692 HUANG, X., WULLSCHLEGER, S., SHPIRO, N., MCGUIRE, V. A., SAKAMOTO, K.,  
693 WOODS, Y. L., MCBURNIE, W., FLEMING, S. & ALESSI, D. R. 2008. Important role  
694 of the LKB1-AMPK pathway in suppressing tumorigenesis in PTEN-deficient mice.  
695 *Biochem J*, 412, 211-21.
- 696 HUSSEY, R., STIEGLITZ, J., MESGARZADEH, J., LOCKE, T. T., ZHANG, Y. K.,  
697 SCHROEDER, F. C. & SRINIVASAN, S. 2017. Pheromone-sensing neurons regulate  
698 peripheral lipid metabolism in *Caenorhabditis elegans*. *PLoS Genet*, 13, e1006806.
- 699 JABLONKA, E. 2013. Epigenetic inheritance and plasticity: The responsive germline. *Prog*  
700 *Biophys Mol Biol*, 111, 99-107.
- 701 JEONG, D.-E., LEE, Y. & LEE, S.-J. V. 2018. Western Blot Analysis of C. elegans Proteins.  
702 In: HUANG, L. E. (ed.) *Hypoxia: Methods and Protocols*. New York, NY: Springer  
703 New York.
- 704 JO, H., LO, P. K., LI, Y., LOISON, F., GREEN, S., WANG, J., SILBERSTEIN, L. E., YE, K.,  
705 CHEN, H. & LUO, H. R. 2011. Deactivation of Akt by a small molecule inhibitor  
706 targeting pleckstrin homology domain and facilitating Akt ubiquitination. *Proc Natl*  
707 *Acad Sci U S A*, 108, 6486-91.
- 708 JO, H., MONDAL, S., TAN, D., NAGATA, E., TAKIZAWA, S., SHARMA, A. K., HOU, Q.,  
709 SHANMUGASUNDARAM, K., PRASAD, A., TUNG, J. K., TEJEDA, A. O., MAN, H.,  
710 RIGBY, A. C. & LUO, H. R. 2012. Small molecule-induced cytosolic activation of

- 711 protein kinase Akt rescues ischemia-elicited neuronal death. *Proc Natl Acad Sci U S*  
712 *A*, 109, 10581-6.
- 713 JOHNIGK, S. A. & EHLERS, R. U. 1999. Juvenile development and life cycle of  
714 Heterorhabditis bacteriophora and H-indica (Nematoda : Heterorhabditidae).  
715 *Nematology*, 1, 251-260.
- 716 KAATI, G., BYGREN, L. O., PEMBREY, M. & SJOSTROM, M. 2007. Transgenerational  
717 response to nutrition, early life circumstances and longevity. *Eur J Hum Genet*, 15,  
718 784-90.
- 719 KANZAKI, N., KIONTKE, K., TANAKA, R., HIROOKA, Y., SCHWARZ, A., MULLER-  
720 REICHERT, T., CHAUDHURI, J. & PIRES-DASILVA, A. 2017. Description of two  
721 three-gendered nematode species in the new genus *Auanema* (Rhabditina) that are  
722 models for reproductive mode evolution. *Sci Rep*, 7, 11135.
- 723 KAPAH, P., CHEN, D., ROGERS, A. N., KATEWA, S. D., LI, P. W., THOMAS, E. L. &  
724 KOCKEL, L. 2010. With TOR, less is more: a key role for the conserved nutrient-  
725 sensing TOR pathway in aging. *Cell Metab*, 11, 453-65.
- 726 KONDAPAKA, S. B., SINGH, S. S., DASMAHAPATRA, G. P., SAUSVILLE, E. A. & ROY, K.  
727 K. 2003. Perifosine, a novel alkylphospholipid, inhibits protein kinase B activation.  
728 *Mol Cancer Ther*, 2, 1093-103.
- 729 LAPLANTE, M. & SABATINI, D. M. 2012. mTOR signaling in growth control and disease.  
730 *Cell*, 149, 274-93.
- 731 LEE, D. Y., HAYES, J. J., PRUSS, D. & WOLFFE, A. P. 1993. A positive role for histone  
732 acetylation in transcription factor access to nucleosomal DNA. *Cell*, 72, 73-84.
- 733 LEE, H., CHO, J. S., LAMBACHER, N., LEE, J., LEE, S. J., LEE, T. H., GARTNER, A. &  
734 KOO, H. S. 2008. The *Caenorhabditis elegans* AMP-activated protein kinase AAK-2  
735 is phosphorylated by LKB1 and is required for resistance to oxidative stress and for  
736 normal motility and foraging behavior. *J Biol Chem*, 283, 14988-93.
- 737 LI, Y., PRASAD, A., JIA, Y., ROY, S. G., LOISON, F., MONDAL, S., KOCJAN, P.,  
738 SILBERSTEIN, L. E., DING, S. & LUO, H. R. 2011. Pretreatment with phosphatase  
739 and tensin homolog deleted on chromosome 10 (PTEN) inhibitor SF1670 augments  
740 the efficacy of granulocyte transfusion in a clinically relevant mouse model. *Blood*,  
741 117, 6702-13.
- 742 LO, W. S., DUGGAN, L., EMRE, N. C., BELOTSEKOVSKAYA, R., LANE, W. S.,  
743 SHIEKHATTAR, R. & BERGER, S. L. 2001. Snf1--a histone kinase that works in  
744 concert with the histone acetyltransferase Gcn5 to regulate transcription. *Science*,  
745 293, 1142-6.
- 746 LONGNUS, S. L., WAMBOLT, R. B., PARSONS, H. L., BROWNSEY, R. W. & ALLARD, M.  
747 F. 2003. 5-Aminoimidazole-4-carboxamide 1-beta -D-ribofuranoside (AICAR)  
748 stimulates myocardial glycogenolysis by allosteric mechanisms. *Am J Physiol Regul*  
749 *Integr Comp Physiol*, 284, R936-44.
- 750 MA, X. M. & BLENIS, J. 2009. Molecular mechanisms of mTOR-mediated translational  
751 control. *Nat Rev Mol Cell Biol*, 10, 307-18.
- 752 MANNING, B. D. & CANTLEY, L. C. 2007. AKT/PKB signaling: navigating downstream. *Cell*,  
753 129, 1261-74.
- 754 MANNING, B. D. & TOKER, A. 2017. AKT/PKB Signaling: Navigating the Network. *Cell*, 169,  
755 381-405.
- 756 MARTELLI, A. M., TABELLINI, G., BRESSANIN, D., OGNIBENE, A., GOTO, K., COCCO, L.  
757 & EVANGELISTI, C. 2012. The emerging multiple roles of nuclear Akt. *Biochimica et*  
758 *Biophysica Acta (BBA) - Molecular Cell Research*, 1823, 2168-2178.
- 759 MILNE, J. C., LAMBERT, P. D., SCHENK, S., CARNEY, D. P., SMITH, J. J., GAGNE, D. J.,  
760 JIN, L., BOSS, O., PERNI, R. B., VU, C. B., BEMIS, J. E., XIE, R., DISCH, J. S., NG,  
761 P. Y., NUNES, J. J., LYNCH, A. V., YANG, H., GALONEK, H., ISRAELIAN, K.,  
762 CHOY, W., IFFLAND, A., LAVU, S., MEDVEDIK, O., SINCLAIR, D. A., OLEFSKY, J.  
763 M., JIROUSEK, M. R., ELLIOTT, P. J. & WESTPHAL, C. H. 2007. Small molecule  
764 activators of SIRT1 as therapeutics for the treatment of type 2 diabetes. *Nature*, 450,  
765 712-6.

- 766 MISKA, E. A. & FERGUSON-SMITH, A. C. 2016. Transgenerational inheritance: Models and  
767 mechanisms of non-DNA sequence-based inheritance. *Science*, 354, 59-63.
- 768 MOUSSEAU, T. A. & DINGLE, H. 1991. Maternal effects in insect life histories. *Annual*  
769 *Review of Entomology*, 36, 511-534.
- 770 NARBONNE, P. & ROY, R. 2006. Inhibition of germline proliferation during *C. elegans* dauer  
771 development requires PTEN, LKB1 and AMPK signalling. *Development*, 133, 611-9.
- 772 OWEN, M. R., DORAN, E. & HALESTRAP, A. P. 2000. Evidence that metformin exerts its  
773 anti-diabetic effects through inhibition of complex 1 of the mitochondrial respiratory  
774 chain. *Biochem J*, 348 Pt 3, 607-14.
- 775 PACHOLEC, M., BLEASDALE, J. E., CHRUNYK, B., CUNNINGHAM, D., FLYNN, D.,  
776 GAROFALO, R. S., GRIFFITH, D., GRIFFOR, M., LOULAKIS, P., PABST, B., QIU,  
777 X., STOCKMAN, B., THANABAL, V., VARGHESE, A., WARD, J., WITHKA, J. &  
778 AHN, K. 2010. SRT1720, SRT2183, SRT1460, and resveratrol are not direct  
779 activators of SIRT1. *J Biol Chem*, 285, 8340-51.
- 780 PARADIS, S. & RUVKUN, G. 1998. *Caenorhabditis elegans* Akt/PKB transduces insulin  
781 receptor-like signals from AGE-1 PI3 kinase to the DAF-16 transcription factor.  
782 *Genes Dev*, 12, 2488-98.
- 783 PEREZ, M. F. & LEHNER, B. 2019. Intergenerational and transgenerational epigenetic  
784 inheritance in animals. *Nature Cell Biology*, 21, 143-151.
- 785 RAJAGOPALAN, P. T., ZHANG, Z., MCCOURT, L., DWYER, M., BENKOVIC, S. J. &  
786 HAMMES, G. G. 2002. Interaction of dihydrofolate reductase with methotrexate:  
787 ensemble and single-molecule kinetics. *Proc Natl Acad Sci U S A*, 99, 13481-6.
- 788 ROBIDA-STUBBS, S., GLOVER-CUTTER, K., LAMMING, D. W., MIZUNUMA, M.,  
789 NARASIMHAN, S. D., NEUMANN-HAEFELIN, E., SABATINI, D. M. & BLACKWELL,  
790 T. K. 2012. TOR signaling and rapamycin influence longevity by regulating SKN-1/Nrf  
791 and DAF-16/FoxO. *Cell Metab*, 15, 713-24.
- 792 ROSIVATZ, E., MATTHEWS, J. G., MCDONALD, N. Q., MULET, X., HO, K. K., LOSSI, N.,  
793 SCHMID, A. C., MIRABELLI, M., POMERANZ, K. M., ERNEUX, C., LAM, E. W.,  
794 VILAR, R. & WOSCHOLSKI, R. 2006. A small molecule inhibitor for phosphatase  
795 and tensin homologue deleted on chromosome 10 (PTEN). *ACS Chem Biol*, 1, 780-  
796 90.
- 797 RUDERMAN, N. B., XU, X. J., NELSON, L., CACICEDO, J. M., SAHA, A. K., LAN, F. & IDO,  
798 Y. 2010. AMPK and SIRT1: a long-standing partnership? *Am J Physiol Endocrinol*  
799 *Metab*, 298, E751-60.
- 800 SAKAMOTO, K., GORANSSON, O., HARDIE, D. G. & ALESSI, D. R. 2004. Activity of LKB1  
801 and AMPK-related kinases in skeletal muscle: effects of contraction, phenformin, and  
802 AICAR. *Am J Physiol Endocrinol Metab*, 287, E310-7.
- 803 SALMINEN, A., KAUPPINEN, A. & KAARNIRANTA, K. 2016. AMPK/Snf1 signaling  
804 regulates histone acetylation: Impact on gene expression and epigenetic functions.  
805 *Cellular Signalling*, 28, 887-895.
- 806 SCHULENBURG, H. & FELIX, M. A. 2017. The natural biotic environment of *Caenorhabditis*  
807 *elegans*. *Genetics*, 206, 55-86.
- 808 SEAMON, K. B., DALY, J. W., METZGER, H., DE SOUZA, N. J. & REDEN, J. 1983.  
809 Structure-activity relationships for activation of adenylate cyclase by the diterpene  
810 forskolin and its derivatives. *J Med Chem*, 26, 436-9.
- 811 SHARMA, U., CONINE, C. C., SHEA, J. M., BOSKOVIC, A., DERR, A. G., BING, X. Y.,  
812 BELLEANNEE, C., KUCUKURAL, A., SERRA, R. W., SUN, F., SONG, L., CARONE,  
813 B. R., RICCI, E. P., LI, X. Z., FAUQUIER, L., MOORE, M. J., SULLIVAN, R., MELLO,  
814 C. C., GARBER, M. & RANDO, O. J. 2016. Biogenesis and function of tRNA  
815 fragments during sperm maturation and fertilization in mammals. *Science*, 351, 391-  
816 6.
- 817 SHAW, R. J., KOSMATKA, M., BARDEESY, N., HURLEY, R. L., WITTERS, L. A.,  
818 DEPINHO, R. A. & CANTLEY, L. C. 2004. The tumor suppressor LKB1 kinase  
819 directly activates AMP-activated kinase and regulates apoptosis in response to  
820 energy stress. *Proc Natl Acad Sci U S A*, 101, 3329-35.

- 821 SHIMAZU, T., HIRSCHHEY, M. D., NEWMAN, J., HE, W., SHIRAKAWA, K., LE MOAN, N.,  
822 GRUETER, C. A., LIM, H., SAUNDERS, L. R., STEVENS, R. D., NEWGARD, C. B.,  
823 FARESE, R. V., JR., DE CABO, R., ULRICH, S., AKASSOGLU, K. & VERDIN, E.  
824 2013. Suppression of oxidative stress by beta-hydroxybutyrate, an endogenous  
825 histone deacetylase inhibitor. *Science*, 339, 211-4.
- 826 SOLARI, F., BOURBON-PIFFAUT, A., MASSE, I., PAYRASTRE, B., CHAN, A. M. &  
827 BILLAUD, M. 2005. The human tumour suppressor PTEN regulates longevity and  
828 dauer formation in *Caenorhabditis elegans*. *Oncogene*, 24, 20-7.
- 829 SOLOMON, J. M., PASUPULETI, R., XU, L., MCDONAGH, T., CURTIS, R., DISTEFANO,  
830 P. S. & HUBER, L. J. 2006. Inhibition of SIRT1 catalytic activity increases p53  
831 acetylation but does not alter cell survival following DNA damage. *Mol Cell Biol*, 26,  
832 28-38.
- 833 STEIN, S. C., WOODS, A., JONES, N. A., DAVISON, M. D. & CARLING, D. 2000. The  
834 regulation of AMP-activated protein kinase by phosphorylation. *Biochem J*, 345 Pt 3,  
835 437-43.
- 836 STEINBERG, G. R. & CARLING, D. 2019. AMP-activated protein kinase: the current  
837 landscape for drug development. *Nat Rev Drug Discov*, 18, 527-551.
- 838 STENEBERG, P., LINDAHL, E., DAHL, U., LIDH, E., STRASEVICIENE, J., BACKLUND, F.,  
839 KJELLKVIST, E., BERGGREN, E., LUNDBERG, I., BERGQVIST, I., ERICSSON, M.,  
840 ERIKSSON, B., LINDE, K., WESTMAN, J., EDLUND, T. & EDLUND, H. 2018. PAN-  
841 AMPK activator O304 improves glucose homeostasis and microvascular perfusion in  
842 mice and type 2 diabetes patients. *JCI Insight*, 3, e99114.
- 843 STIERNAGLE, T. 2006. Maintenance of *C. elegans*. *WormBook*, 1-11.
- 844 TOYAMA, E. Q., HERZIG, S., COURCHET, J., LEWIS, T. L., JR., LOSON, O. C.,  
845 HELLBERG, K., YOUNG, N. P., CHEN, H., POLLEUX, F., CHAN, D. C. & SHAW, R.  
846 J. 2016. Metabolism. AMP-activated protein kinase mediates mitochondrial fission in  
847 response to energy stress. *Science*, 351, 275-281.
- 848 ULLER, T. 2008. Developmental plasticity and the evolution of parental effects. *Trends Ecol*  
849 *Evol*, 23, 432-8.
- 850 WATTS, J. L., MORTON, D. G., BESTMAN, J. & KEMPHUES, K. J. 2000. The *C. elegans*  
851 *par-4* gene encodes a putative serine-threonine kinase required for establishing  
852 embryonic asymmetry. *Development*, 127, 1467-75.
- 853 WEST-EBERHARD, M. J. 2003. *Developmental plasticity and evolution*, Oxford ; New York,  
854 Oxford University Press.
- 855 WOODS, A., JOHNSTONE, S. R., DICKERSON, K., LEIPER, F. C., FRYER, L. G.,  
856 NEUMANN, D., SCHLATTNER, U., WALLIMANN, T., CARLSON, M. & CARLING, D.  
857 2003. LKB1 is the upstream kinase in the AMP-activated protein kinase cascade.  
858 *Curr Biol*, 13, 2004-8.
- 859 WULLSCHLEGER, S., LOEWITH, R. & HALL, M. N. 2006. TOR signaling in growth and  
860 metabolism. *Cell*, 124, 471-84.
- 861 XENOS, E. S., STEVENS, S. L., FREEMAN, M. B., CASSADA, D. C. & GOLDMAN, M. H.  
862 2005. Nitric oxide mediates the effect of fluvastatin on intercellular adhesion  
863 molecule-1 and platelet endothelial cell adhesion molecule-1 expression on human  
864 endothelial cells. *Ann Vasc Surg*, 19, 386-92.
- 865 YANG, W., HONG, Y. H., SHEN, X. Q., FRANKOWSKI, C., CAMP, H. S. & LEFF, T. 2001.  
866 Regulation of transcription by AMP-activated protein kinase: phosphorylation of p300  
867 blocks its interaction with nuclear receptors. *J Biol Chem*, 276, 38341-4.
- 868 YOSHIDA, M., KIJIMA, M., AKITA, M. & BEPPU, T. 1990. Potent and specific inhibition of  
869 mammalian histone deacetylase both in vivo and in vitro by trichostatin A. *J Biol*  
870 *Chem*, 265, 17174-9.
- 871 ZARSE, K., SCHMEISSER, S., BIRNINGER, M., FALK, E., SCHMOLL, D. & RISTOW, M.  
872 2010. Differential effects of resveratrol and SRT1720 on lifespan of adult  
873 *Caenorhabditis elegans*. *Horm Metab Res*, 42, 837-9.
- 874 ZHANG, L. N., XU, L., ZHOU, H. Y., WU, L. Y., LI, Y. Y., PANG, T., XIA, C. M., QIU, B. Y.,  
875 GU, M., DONG, T. C., LI, J. Y., SHEN, J. K. & LI, J. 2013. Novel small-molecule



876 AMP-activated protein kinase allosteric activator with beneficial effects in db/db mice.  
877 *PLoS One*, 8, e72092.  
878 ZHANG, M., POPLAWSKI, M., YEN, K., CHENG, H., BLOSS, E., ZHU, X., PATEL, H. &  
879 MOBBS, C. V. 2009. Role of CBP and SATB-1 in aging, dietary restriction, and  
880 insulin-like signaling. *PLoS Biol*, 7, e1000245.  
881 ZHOU, G., MYERS, R., LI, Y., CHEN, Y., SHEN, X., FENYK-MELODY, J., WU, M.,  
882 VENTRE, J., DOEBBER, T., FUJII, N., MUSI, N., HIRSHMAN, M. F., GOODYEAR,  
883 L. J. & MOLLER, D. E. 2001. Role of AMP-activated protein kinase in mechanism of  
884 metformin action. *J Clin Invest*, 108, 1167-74.  
885 ZONCU, R., EFEYAN, A. & SABATINI, D. M. 2011. mTOR: from growth signal integration to  
886 cancer, diabetes and ageing. *Nat Rev Mol Cell Biol*, 12, 21-35.  
887 ZUCO, G., KACHE, V., ROBLES, P., CHAUDHURI, J., HILL, B., BATESON, C. & PIRES DA  
888 SILVA, A. 2018. Sensory neurons control heritable adaptation to stress through  
889 germline reprogramming. *bioRxiv*, 406033.  
890

891

892

893

894

895

896

897

898

899

900

901

902

903

904

905

906

907

908

909

910

911

912

913

914

915 **Supplemental Figures**

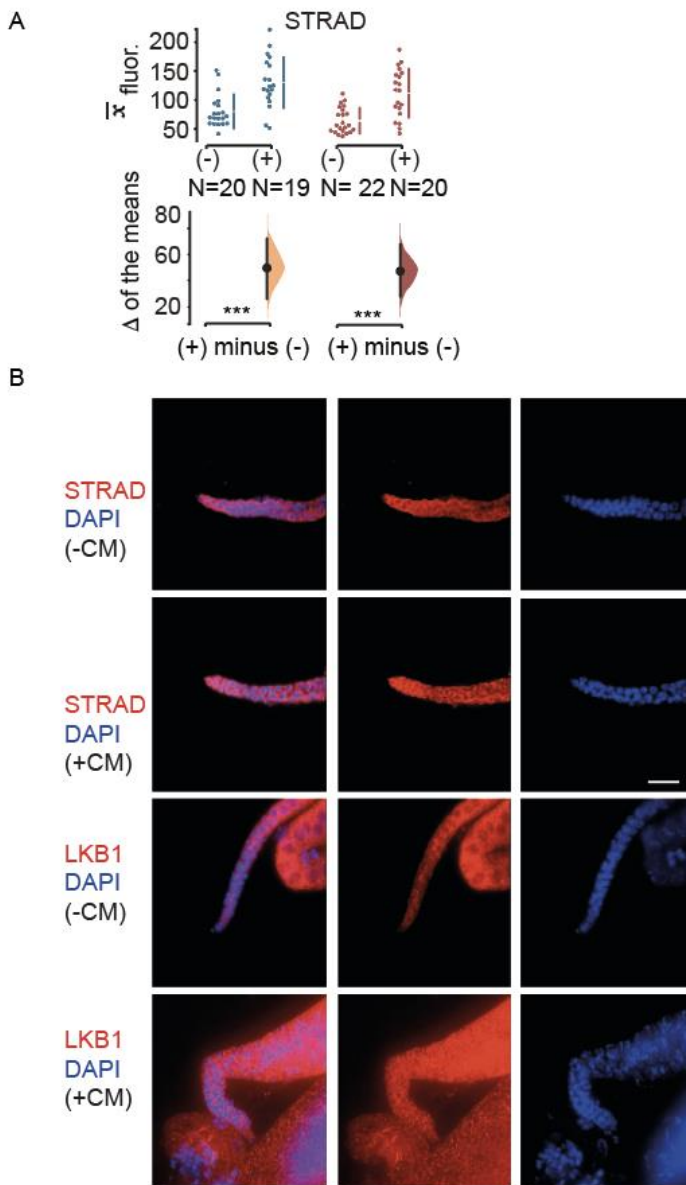

916

917 **Supplemental Figure 1. STRAD and LKB1 antibody staining is higher in**

918 **animals in crowding conditions. A.** Mean antibody fluorescence ( $\bar{x}$ ) in the pre-

919 meiotic (blue) and meiotic portion (red) of the germline, in the absence (-) or

920 presence (+) of conditioned medium. N= sample sizes. Graphical representation as

921 Fig. 2, with \*\*\*=  $p \leq 0.001$ . **B.** LKB1 and STRAD in the germline. Staining for

922 antibodies (in red) against LKB1 and STRAD of gonads dissected from

923 hermaphrodites incubated in the presence of either (-) CM or (+) CM. The DNA was

924 stained with DAPI (blue). Bar, 15  $\mu$ m.

925  
926  
927  
928

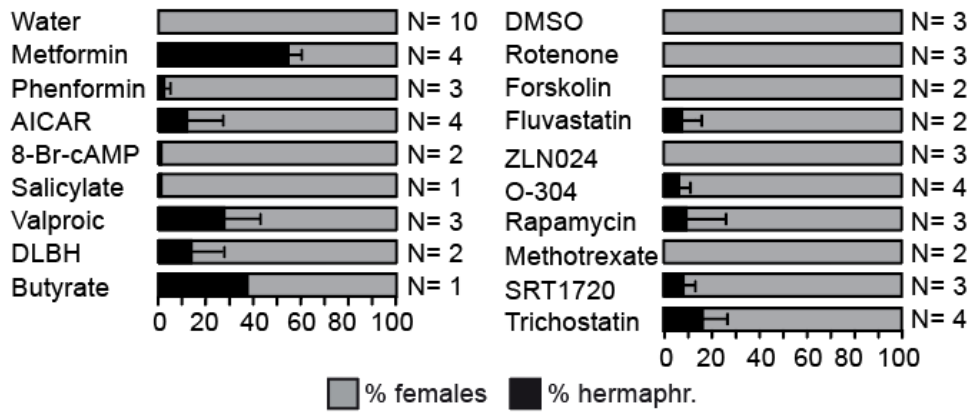

929

930 **Supplemental Figure 2. Most chemical compounds affect the sex ratios of**  
931 **hermaphrodites in the absence of diluted CM.** Mean percentage and SD of  
932 hermaphrodite and female F1 offspring from hermaphrodites treated with chemicals.  
933 Chemicals were dissolved either in water or in DMSO. N= number of replicates.

934

935

936

937

938



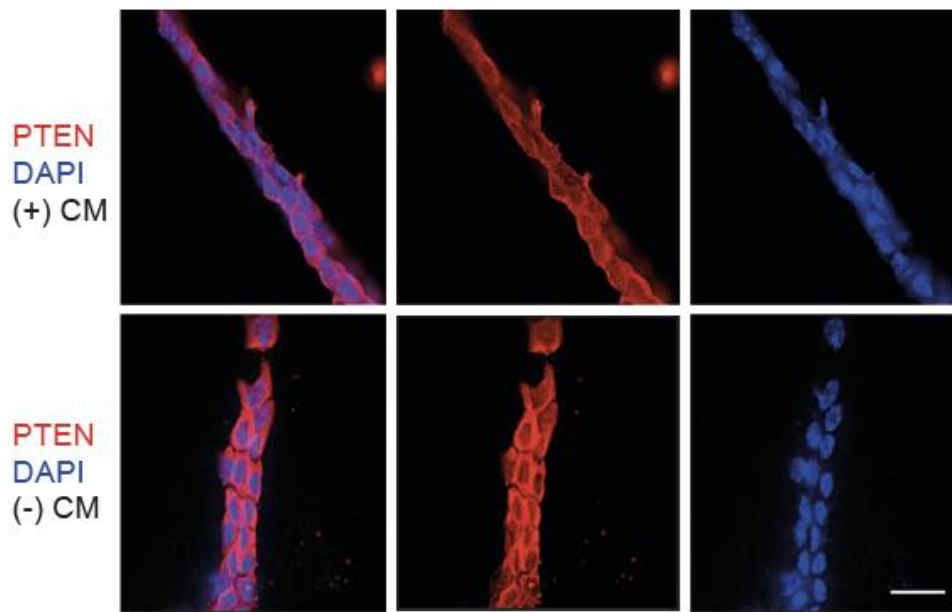

939

940 **Supplemental Figure 3. PTEN/DAF-18 in the germline is cytoplasmic and**  
941 **higher in non-crowding conditions.** Staining for antibodies (in red) against  
942 PTEN/DAF-18 of gonads dissected from hermaphrodites incubated in the presence  
943 of either (-) CM or (+) CM. The DNA was stained with DAPI (blue). Bar, 15  $\mu$ m.

944

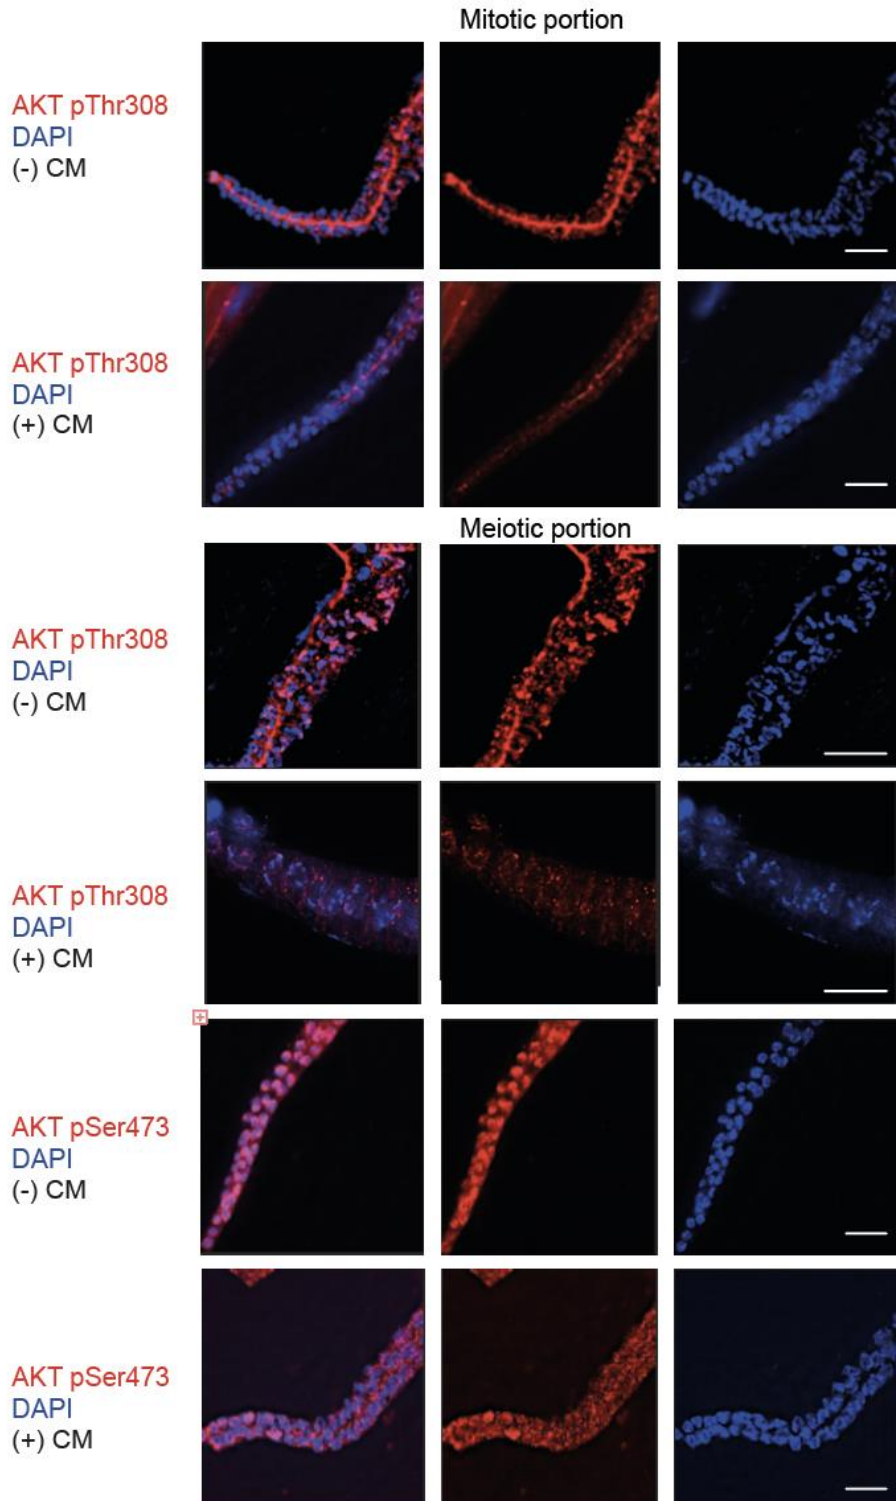

945

946 **Supplemental Figure 4. AKT pThr308 in the germline is nuclear and higher in**  
947 **crowding conditions.** Staining for antibodies (in red) against AKT pThr308 of  
948 gonads dissected from hermaphrodites incubated in the presence of either (-) CM or  
949 (+) CM. The DNA was stained with DAPI (blue). Bar, 15  $\mu$ m.

950

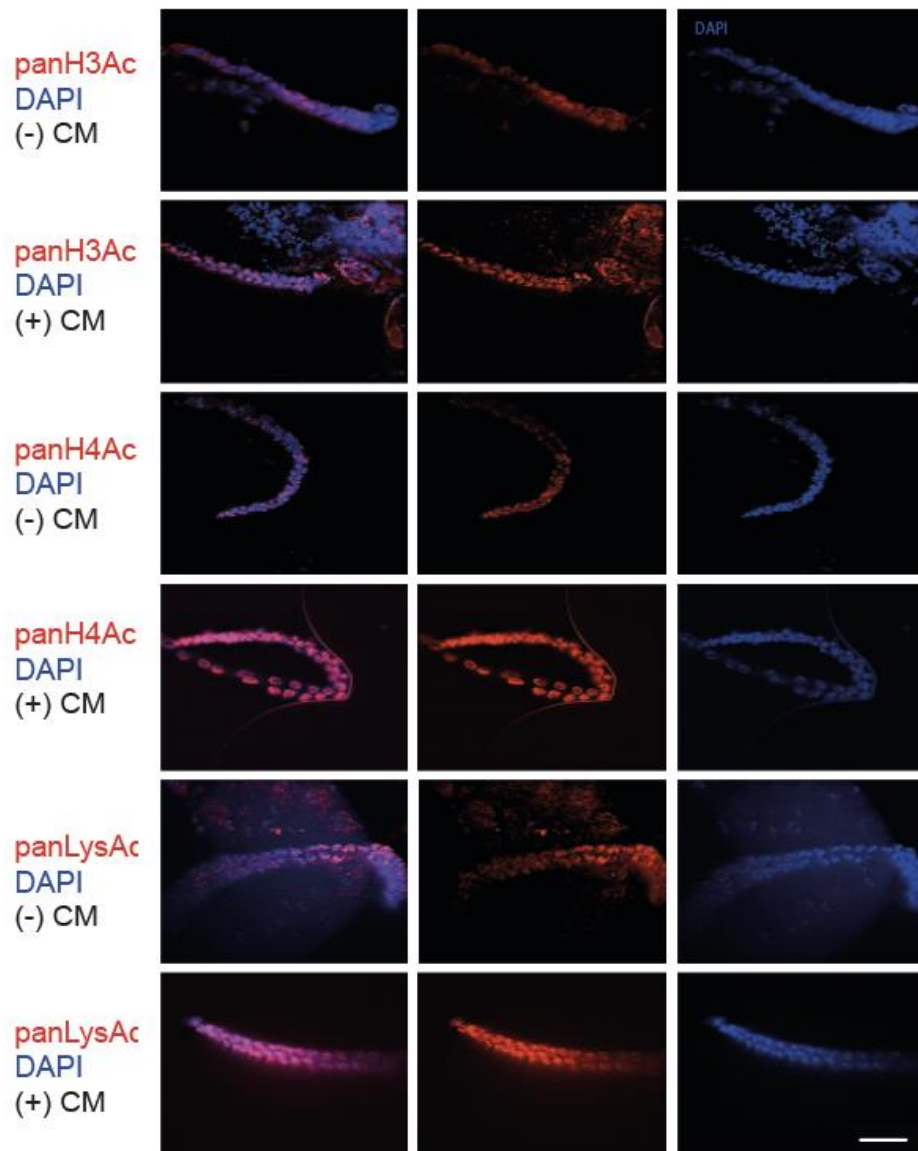

951

952 **Supplemental Figure 5. Acetylation in the germline is nuclear and higher in**  
953 **crowding conditions.** Staining for antibodies (in red) against panH3Ac, panH4Ac  
954 and panLysAc of gonads dissected from hermaphrodites incubated in the presence  
955 of either (-) CM or (+) CM. The DNA was stained with DAPI (blue). Bar, 15  $\mu$ m.

956

957

958

959

960
